# Supplementary material for: Offspring of Mice Exposed to a Low-Protein Diet in Utero Demonstrate Changes in mTOR Signaling in Pancreatic Islets of Langerhans, Associated with Altered Glucagon and Insulin Expression and a Lower β-Cell Mass
Source: MDPI journal article supplement (doi:10.3390/nu11030605), 2019-03-12
Supplement: s1 [file s1]

**Supplementary Table 1.** Composition of the isocaloric LP and control diets (g/100g of diet).

|                         | Control | LP     |
|-------------------------|---------|--------|
| Cornstarch              | 40      | 40     |
| Casein (88% protein)    | 22.3    | 8.6    |
| Maltodextrin            | 13.2    | 13.2   |
| Sucrose                 | 10.0    | 23.6   |
| Soybean oil             | 4.5     | 4.5    |
| Cellulose               | 5.0     | 5.0    |
| Mineral mix             | 3.5     | 3.5    |
| Vitamin mix             | 1.0     | 1.0    |
| L-Cysteine              | 0.3     | 0.3    |
| Choline Bitartrate      | 0.25    | 0.25   |
| Tert-butyl hydroquinone | 0.0014  | 0.0014 |
| DL-Methionine           | 2       | 0.8    |

Obtained from Bioserv, Frenchtown, NJ, USA

**Supplementary Table 2.** Primer source and amplicon sizes for TaqMan primers utilized for quantitative real-time PCR analysis, and forward and reverse primer sequences for TSC2 and proglucagon.

| Target          | Manufacturer       | Catalogue #                                                  | Amplicon Size |
|-----------------|--------------------|--------------------------------------------------------------|---------------|
| mTOR            | Applied Biosystems | Mm00444968_m1                                                | 65            |
| Raptor          | Applied Biosystems | Mm01242613_m1                                                | 64            |
| Rictor          | Applied Biosystems | Mm01307318_m1                                                | 75            |
| Ins1            | Applied Biosystems | Mm01950294_s1                                                | 80            |
| Sting           | Applied Biosystems | Mm01158117_m1                                                | 104           |
| Gapdh           | Applied Biosystems | Mm99999915_g1                                                | 109           |
| <b>Sequence</b> |                    |                                                              |               |
| TSC2            | Sigma-Aldrich      | Forward AGGCCAGAGCAGCAGTG<br>Reverse AAGCCGACCCAGGCCTGTCA    |               |
| Proglucagon     | Sigma-Aldrich      | Forward AGCTTGGCCCAGGACACACT<br>Reverse CCAGCTGCCTTGCACCAGCA |               |
